# Supplementary material for: Parallel colonization of subalpine habitats in the central European mountains by Primula elatior
Source: PubMed Central journal article supplement (PMC6397301; doi:10.1038/s41598-019-39669-2), 2019-03-01
Supplement: 41598_2019_39669_MOESM1_ESM.pdf [file 41598_2019_39669_MOESM1_ESM.pdf]

## Supplementary Information file

### Parallel colonization of subalpine habitats in the central European mountains by *Primula elatior*

Veronika Konečná<sup>1,2\*</sup>, Michael D. Nowak<sup>3</sup>, Filip Kolář<sup>1,2,4</sup>

<sup>1</sup>*Department of Botany, Faculty of Science, Charles University, Benátská 2, CZ-128 00 Prague, Czech Republic*

<sup>2</sup>*Institute of Botany, The Czech Academy of Sciences, Zámek 1, CZ-252 43 Průhonice, Czech Republic*

<sup>3</sup>*Natural History Museum, University of Oslo, Sars' gate 1, NO-0562 Oslo, Norway*

<sup>4</sup>*Department of Botany, University of Innsbruck, Sternwartestraße 15, AT-6020 Innsbruck, Austria*

\*Correspondence to Veronika Konečná ([konecnv@natur.cuni.cz](mailto:konecnv@natur.cuni.cz))

**Supplementary Table S1.** Locality details on 16 populations of *Primula elatior* sampled in the study.

| Pop. ID | Locality                 | Locality details                                                                                                                                                       |
|---------|--------------------------|------------------------------------------------------------------------------------------------------------------------------------------------------------------------|
| F1      | Žďárský potok u Rýmařova | CZ, Olomoucký kraj, Žďárský potok u Rýmařova, valley meadow along the river Slatinný potok, 735 m, 49.9679331N, 17.208975E, V. Konečná                                 |
| F2      | V Mlýnkách               | CZ, Olomoucký kraj, meadow in the forest near Javořický potok, 4 km SW from Jeseník town, 618 m, 50.198507N, 17.15203E, V. Konečná                                     |
| S1      | Velká Kotlina            | CZ, Olomoucký kraj, upper part of the Velká Kotlina glacial cirque in grassy slope, 1397 m, 50.0566111N, 17.2334444E, V. Konečná                                       |
| S2      | Velká Kotlina - edge     | CZ, Olomoucký kraj, Velká Kotlina - edge of the glacial cirque above treeline, 1301 m, 50.058142N, 17.23931E, V. Konečná                                               |
| F6      | Michlův mlýn             | CZ, Královéhradecký kraj, slope above the road along forest edge, 3 km S from Špindlerův Mlýn, 658 m, 50.6989081N, 15.58808E, V. Konečná                               |
| F7      | Svatý Petr               | CZ, Královéhradecký kraj, meadow above the road in Svätý Petr, 816 m, 50.7251831N, 15.6313581E, V. Konečná                                                             |
| F3      | Strážné                  | CZ, Královéhradecký kraj, meadow in Strážné, 3 km NE from Vrchlabí, 776 m, 50.6619181N, 15.613365E, V. Konečná                                                         |
| F4      | Spálený mlýn             | CZ, Královéhradecký kraj, river bank in the valley of Malá Úpa river, 5 km NE from Pec pod Sněžkou, 788 m, 50.7067281N, 15.8045919E, V. Konečná                        |
| S3      | Velká Kotelní jáma       | CZ, Královéhradecký kraj, upper part of the Velká Kotelní jáma glacial cirque along the stream, limestone, 1280 m, 50.7516589N, 15.534064E, V. Konečná, L. Harčariková |
| S4      | Malá Sněžná jáma         | PL, Województwo dolnośląskie, basalt outcrop in the NW part of the Malá Sněžná jáma glacial cirque, 1368 m, 50.7833086N, 15.5550314E, J. Harčarik, V. Konečná          |
| F8      | Ždiar, Tatranská Kotlina | SK, Prešovský kraj, meadow in the valley Tatranská Kotlina of the river Biela, 6 km SE from Ždiar, 769 m, 49.23075N, 20.318285E, V. Konečná                            |
| S9      | Zamkovského chata        | SK, Prešovský kraj, river bank of the stream Malý Studený potok in Malá Studená dolina valley, 1470 m, 49.173491N, 20.219337E, V. Konečná                              |
| S11     | Kondraczka               | PL, Województwo małopolskie, snowbed on the NE slope of Kopa Kondraczka mountain, 1950 m, 49.236847N, 19.931016E, F. Kolář                                             |
| S12     | Tristar                  | SK, Prešovský kraj, grassy slope in Tristarska dolina, 3 km SW from Ždiar, 1450 m, 49.252393N, 20.207481E, F. Kolář                                                    |
| F5      | Poludnica                | SK, Žilinský kraj, along the forest edge of meadow in Janská dolina valley in Liptovský Ján, 1055 m, 49.026427N, 19.652469E, V. Konečná                                |
| S5      | Štefánikova chata        | SK, Žilinský kraj, meadow below the Štefániková chata cottage at the top of dolina Štiavnica valley, 1709 m, 48.9265242N, 19.6494031E, V. Konečná                      |

**Supplementary Table S2.** Summary of 12 microsatellite loci.

| Locus name | Genbank accession number | Dye   | Primer sequences                                         | Repeat sequence      | Size range (bp) | N alleles | Multiplex |
|------------|--------------------------|-------|----------------------------------------------------------|----------------------|-----------------|-----------|-----------|
| Paca 11    | KJ134992                 | 6-FAM | F: TTCGTGATGAAGTTGACTTTTATG<br>R: AACAGCAATATCAGAGTCCAGA | (TC) <sub>12</sub>   | 83 - 101        | 9         | 1         |
| Paca 38    | KJ134995                 | NED   | F: ACATTCAGCGAGTGATTTGG<br>R: GCAGAGCGTGGTCTATGTT        | (AAC) <sub>5</sub>   | 189 - 210       | 6         | 2         |
| Paca 78    | KJ135002                 | VIC   | F: TGTGCGACTGCCTCTATCTC<br>R: GACTGAGAAGACATATGTTGAAAGA  | (CT) <sub>11</sub>   | 116 - 164       | 22        | 1         |
| PV 279     | KF220372                 | NED   | F: GTCCACCACCCTCTTATCCG<br>R: CCTCGAGTTGGAGTACTTGC       | (TG) <sub>17</sub>   | 101 - 147       | 18        | 1         |
| PV 23424   | KF220365                 | PET   | F: GCAGTGGATGGGTATGAAAG<br>R: GTGGTAGCTTCTTGTTCAGGG      | (CAA) <sub>7</sub>   | 159 - 183       | 9         | 1         |
| PV 23741   | KF220368                 | PET   | F: GCTTGAACGGTGATAGCGAC<br>R: GTATCGGTCGTGCCATTTCCG      | (TGT) <sub>7</sub>   | 158 - 179       | 8         | 2         |
| PV 21795   | KF220366                 | VIC   | F: TCCTACATCGCAACATCTTCTG<br>R: CCACATACGGCTCTGACATC     | (ATAC) <sub>7</sub>  | 169 - 225       | 12        | 1         |
| PV 4767    | KF220370                 | NED   | F: TGGTATTTCTTCTGCTTCTTTC<br>R: ACGGCTAAAGTACCACCACC     | (CTT) <sub>10</sub>  | 104 - 140       | 12        | 2         |
| PV 27775   | KF220373                 | VIC   | F: TCCGAGTACAGATCATGGAAC<br>R: CCTGCATGTACTAGAGCCAAC     | (CATA) <sub>13</sub> | 163 - 215       | 13        | 2         |
| PV 19773   | KF220375                 | 6-FAM | F: TTCAATTTCTGTGAAGGCTGG<br>R: TCGGGATATGCCAATCAATGC     | (GTT) <sub>13</sub>  | 191 - 221       | 10        | 2         |
| PRIV 4     | DQ858205                 | PET   | F: ACTCTTCTTGTTCCTCTCCCA<br>R: ACCTAGTTCCTCGCTCCACA      | (GT) <sub>24</sub>   | 75 - 123        | 25        | 1         |
| PRIV 7     | DQ858207                 | 6-FAM | F: GATTCCAACAACACTACGGTTCA<br>R: CAATGAAAATCTACATGTTACG  | (GT) <sub>14</sub>   | 190 - 252       | 28        | 1         |

**Supplementary Table S3.** Pairwise  $F_{ST}$  among populations in the three target mountain ranges; F = foothill populations, S = subalpine populations.

| Pop. ID | Krkonoše Mts |       |       |       |       |       | Jeseniky Mts |       |       |       | Tatry Mts |       |       |       |       |
|---------|--------------|-------|-------|-------|-------|-------|--------------|-------|-------|-------|-----------|-------|-------|-------|-------|
|         | S3           | S4    | F4    | F3    | F6    | F7    | F1           | F2    | S2    | S1    | F5        | S5    | S11   | S9    | F8    |
| S3      |              |       |       |       |       |       |              |       |       |       |           |       |       |       |       |
| S4      | 0.132        |       |       |       |       |       |              |       |       |       |           |       |       |       |       |
| F4      | 0.092        | 0.132 |       |       |       |       |              |       |       |       |           |       |       |       |       |
| F3      | 0.068        | 0.113 | 0.050 |       |       |       |              |       |       |       |           |       |       |       |       |
| F6      | 0.091        | 0.131 | 0.076 | 0.035 |       |       |              |       |       |       |           |       |       |       |       |
| F7      | 0.056        | 0.109 | 0.080 | 0.046 | 0.068 |       |              |       |       |       |           |       |       |       |       |
| F1      | 0.214        | 0.203 | 0.202 | 0.199 | 0.229 | 0.179 |              |       |       |       |           |       |       |       |       |
| F2      | 0.174        | 0.169 | 0.153 | 0.147 | 0.179 | 0.162 | 0.057        |       |       |       |           |       |       |       |       |
| S2      | 0.155        | 0.172 | 0.139 | 0.142 | 0.177 | 0.140 | 0.091        | 0.069 |       |       |           |       |       |       |       |
| S1      | 0.157        | 0.196 | 0.173 | 0.159 | 0.202 | 0.163 | 0.075        | 0.071 | 0.035 |       |           |       |       |       |       |
| F5      | 0.079        | 0.103 | 0.071 | 0.085 | 0.102 | 0.084 | 0.103        | 0.075 | 0.079 | 0.096 |           |       |       |       |       |
| S5      | 0.233        | 0.226 | 0.221 | 0.257 | 0.275 | 0.244 | 0.227        | 0.207 | 0.187 | 0.203 | 0.132     |       |       |       |       |
| S11     | 0.102        | 0.114 | 0.133 | 0.115 | 0.169 | 0.176 | 0.090        | 0.084 | 0.091 | 0.101 | 0.052     | 0.148 |       |       |       |
| S9      | 0.130        | 0.151 | 0.140 | 0.125 | 0.167 | 0.184 | 0.147        | 0.128 | 0.114 | 0.141 | 0.070     | 0.174 | 0.113 |       |       |
| F8      | 0.114        | 0.118 | 0.113 | 0.117 | 0.146 | 0.119 | 0.142        | 0.123 | 0.097 | 0.132 | 0.060     | 0.137 | 0.068 | 0.079 |       |
| S12     | 0.127        | 0.129 | 0.173 | 0.145 | 0.200 | 0.219 | 0.116        | 0.119 | 0.114 | 0.153 | 0.070     | 0.152 | 0.098 | 0.122 | 0.065 |

**Supplementary Table S4.** Comparisons of different migration models for foothill and subalpine populations using Bayes factor. We calculated for each model: Bezier approximated marginal likelihood (Bezier  $\ln mL$ ), delta Bezier  $\ln mL$  (Delta), natural log Bayes factor (LBF), probability (values lower than  $10^{-6}$  were replaced by zero),  $\vartheta$ ,  $M$  parameters, and number of immigrants ( $Nm$ ); F = foothill populations, S = subalpine populations

| Jeseníky Mts | Model             | Bezier InmL | Delta    | LBF     | Probability | $\vartheta$ S1'                  | $\vartheta$ S1 (CI and median) * | $\vartheta$ S2'                  | $\vartheta$ S2 (CI and median) * | M S1 → S2'       | M S1 → S2 (CI and median) * | Nm        |
|--------------|-------------------|-------------|----------|---------|-------------|----------------------------------|----------------------------------|----------------------------------|----------------------------------|------------------|-----------------------------|-----------|
| S1-S2        | Full migration    | -980.34     | -166.96  | 166.96  | 0           |                                  |                                  |                                  |                                  |                  |                             |           |
|              | S1 → S2           | -813.38     | 0        | 0       | 1           | 1.34, 1.43                       | (0.96) 1.38 (1.61)               | 4.56, 4.67                       | (0.98) 4.63 (6.37)               | 196, 236.5       | (97.6) 229.6 (385)          | 266       |
|              | S2 → S1           | -855.46     | -42.08   | 42.08   | 0           |                                  |                                  |                                  |                                  |                  |                             |           |
|              | Panmictic         | -867.7      | -54.32   | 54.32   | 0           |                                  |                                  |                                  |                                  |                  |                             |           |
|              | Without migration | -1575.3     | -761.92  | 761.92  | 0           |                                  |                                  |                                  |                                  |                  |                             |           |
|              |                   |             |          |         |             | <b><math>\vartheta</math> F1</b> |                                  | <b><math>\vartheta</math> S1</b> |                                  | <b>M S1 → F1</b> |                             | <b>Nm</b> |
| F1-S1        | Full migration    | -1171.49    | -389.15  | 389.15  | 0           |                                  |                                  |                                  |                                  |                  |                             |           |
|              | F1 → S1           | -811.64     | -29.3    | 29.3    | 0           |                                  |                                  |                                  |                                  |                  |                             |           |
|              | S1 → F1           | -782.34     | 0        | 0       | 1           | 2.15, 6.04                       | (0.72) 5.24 (10.5)               | 2.33, 2.37                       | (1.62) 2.39 (3.21)               | 169, 228         | (126) 199 (430)             | 261       |
|              | Panmictic         | -816.81     | -34.47   | 34.47   | 0           |                                  |                                  |                                  |                                  |                  |                             |           |
|              | Without migration | -2313.66    | -1531.32 | 1531.32 | 0           |                                  |                                  |                                  |                                  |                  |                             |           |
|              |                   |             |          |         |             | <b><math>\vartheta</math> F2</b> |                                  | <b><math>\vartheta</math> S1</b> |                                  | <b>M S1 → F2</b> |                             | <b>Nm</b> |
| F2-S1        | Full migration    | -837.58     | -190.01  | 190.01  | 0           |                                  |                                  |                                  |                                  |                  |                             |           |
|              | F2 → S1           | -674.26     | -26.69   | 26.69   | 0           |                                  |                                  |                                  |                                  |                  |                             |           |
|              | S1 → F2           | -647.57     | 0        | 0       | 1           | 3.78, 4.86                       | (0.52) 3.9 (11.64)               | 1.42, 1.45                       | (0.84) 1.92 (2.02)               | 159, 185.52      | (72) 165 (356)              | 161       |
|              | Panmictic         | -722.33     | -74.76   | 74.76   | 0           |                                  |                                  |                                  |                                  |                  |                             |           |
|              | Without migration | -1590.13    | -942.56  | 942.56  | 0           |                                  |                                  |                                  |                                  |                  |                             |           |
|              |                   |             |          |         |             | <b><math>\vartheta</math> F1</b> |                                  | <b><math>\vartheta</math> S2</b> |                                  | <b>M S2 → F1</b> |                             | <b>Nm</b> |
| F1-S2        | Full migration    | -1092.46    | -294.91  | 294.91  | 0           |                                  |                                  |                                  |                                  |                  |                             |           |
|              | F1 → S2           | -831.07     | -33.52   | 33.52   | 0           |                                  |                                  |                                  |                                  |                  |                             |           |

|                     |                   |          |          |         |      |               |                    |               |                    |                  |                 |           |
|---------------------|-------------------|----------|----------|---------|------|---------------|--------------------|---------------|--------------------|------------------|-----------------|-----------|
|                     | S2 → F1           | -797.55  | 0        | 0       | 1    | 2.03,<br>5.28 | (0.5) 3.32 (9.52)  | 1.83,<br>1.69 | (0.7) 1.78 (2.35)  | 15, 35.61        | (15) 25.5 (80)  | 21        |
|                     | Panmictic         | -910.48  | -112.93  | 112.93  | 0    |               |                    |               |                    |                  |                 |           |
|                     | Without migration | -2277.58 | -1480.03 | 1480.03 | 0    |               |                    |               |                    |                  |                 |           |
|                     |                   |          |          |         |      | <b>∅ F2</b>   |                    | <b>∅ S2</b>   |                    | <b>M S2 → F2</b> |                 | <b>Nm</b> |
| F2-S2               | Full migration    | -987.08  | -207.17  | 207.17  | 0    |               |                    |               |                    |                  |                 |           |
|                     | F2 → S2           | -781.36  | -1.45    | 1.45    | 0.19 |               |                    |               |                    |                  |                 |           |
|                     | S2 → F2           | -779.91  | 0        | 0       | 0.81 | 1.49,<br>3.9  | (0.63) 3.32 (8.61) | 2.06,<br>2.09 | (1.47) 2.12 (2.64) | 271, 350.77      | (168) 331 (576) | 173       |
|                     | Panmictic         | -827.65  | -47.74   | 47.74   | 0    |               |                    |               |                    |                  |                 |           |
|                     | Without migration | -1559.47 | -779.56  | 779.56  | 0    |               |                    |               |                    |                  |                 |           |
|                     |                   |          |          |         |      | <b>∅ F1</b>   |                    | <b>∅ F2</b>   |                    | <b>M F1 → F2</b> |                 | <b>Nm</b> |
| F1-F2               | Full migration    | -1123.44 | -369.97  | 369.97  | 0    |               |                    |               |                    |                  |                 |           |
|                     | F1 → F2           | -753.47  | 0        | 0       | 1    | 1.62,<br>1.64 | (1.12) 1.66 (2.08) | 2.1,<br>2.81  | (0.24) 2.38 (6.12) | 281, 403         | (148) 347 (558) | 206       |
|                     | F2 → F1           | -789.13  | -35.66   | 35.66   | 0    |               |                    |               |                    |                  |                 |           |
|                     | Panmictic         | -790.41  | -36.94   | 36.94   | 0    |               |                    |               |                    |                  |                 |           |
|                     | Without migration | -2700.27 | -1946.8  | 1946.8  | 0    |               |                    |               |                    |                  |                 |           |
| <b>Krkonoše Mts</b> |                   |          |          |         |      | <b>∅ S3</b>   |                    | <b>∅ S4</b>   |                    | <b>M S4 → S3</b> |                 | <b>Nm</b> |
| S3-S4               | Full migration    | -1830.12 | -335.46  | 335.46  | 0    |               |                    |               |                    |                  |                 |           |
|                     | S3 → S4           | -1545.92 | -51.26   | 51.26   | 0    |               |                    |               |                    |                  |                 |           |
|                     | S4 → S3           | -1494.66 | 0        | 0       | 1    | 1.52,<br>1.43 | (0.74) 1.43 (2.16) | 1.16,<br>1.14 | (0.67) 1.16 (1.41) | 11, 11.61        | (0.1) 15 (28)   | 5         |
|                     | Panmictic         | -1710.94 | -216.28  | 216.28  | 0    |               |                    |               |                    |                  |                 |           |
|                     | Without migration | -7651.4  | -6156.74 | 6156.74 | 0    |               |                    |               |                    |                  |                 |           |
|                     |                   |          |          |         |      | <b>∅ F3</b>   |                    | <b>∅ S3</b>   |                    | <b>M S3 → F3</b> |                 | <b>Nm</b> |
| F3-S3               | Full migration    | -1605.82 | -421.45  | 421.45  | 0    |               |                    |               |                    |                  |                 |           |

|       |                   |           |          |         |      |               |                     |               |                    |                  |                |           |
|-------|-------------------|-----------|----------|---------|------|---------------|---------------------|---------------|--------------------|------------------|----------------|-----------|
|       | F3 → S3           | -1195.27  | -10.9    | 10.9    | 0    |               |                     |               |                    |                  |                |           |
|       | S3 → F3           | -1184.37  | 0        | 0       | 1    | 7.39,<br>6.3  | (4.3) 6.61 (8.98)   | 2.3,<br>2.13  | (1.64) 2.23 (2.68) | 39, 43.92        | (10) 41 (72)   | 68        |
|       | Panmictic         | -1312.92  | -128.55  | 128.55  | 0    |               |                     |               |                    |                  |                |           |
|       | Without migration | -10469.49 | -9285.12 | 9285.12 | 0    |               |                     |               |                    |                  |                |           |
|       |                   |           |          |         |      | <b>∅ F4</b>   |                     | <b>∅ S3</b>   |                    | <b>M S3 → F4</b> |                | <b>Nm</b> |
| F4-S3 | Full migration    | -1352.33  | -530.44  | 530.44  | 0    |               |                     |               |                    |                  |                |           |
|       | F4 → S3           | -823.53   | -1.64    | 1.64    | 0.16 |               |                     |               |                    |                  |                |           |
|       | S3 → F4           | -821.89   | 0        | 0       | 0.84 | 8.24,<br>7.97 | (1.83) 7.97 (14.25) | 1.37,<br>1.41 | (0.93) 1.43 (1.77) | 115, 150.88      | (22) 129 (308) | 257       |
|       | Panmictic         | -856.62   | -34.73   | 34.73   | 0    |               |                     |               |                    |                  |                |           |
|       | Without migration | -1158.11  | -336.22  | 336.22  | 0    |               |                     |               |                    |                  |                |           |
|       |                   |           |          |         |      | <b>∅ F3</b>   |                     | <b>∅ S4</b>   |                    | <b>M S4 → F3</b> |                | <b>Nm</b> |
| F3-S4 | Full migration    | -1266.68  | -131.95  | 131.95  | 0    |               |                     |               |                    |                  |                |           |
|       | F3 → S4           | -1168.32  | -33.59   | 33.59   | 0    |               |                     |               |                    |                  |                |           |
|       | S4 → F3           | -1134.73  | 0        | 0       | 1    | 2.6,<br>4.14  | (0.57) 3.65 (9.42)  | 1.16,<br>1.15 | (0.78) 1.19 (1.47) | 17, 19.67        | (0.2) 19 (34)  | 17        |
|       | Panmictic         | -1178.82  | -44.09   | 44.09   | 0    |               |                     |               |                    |                  |                |           |
|       | Without migration | -6630.48  | -5495.75 | 5495.75 | 0    |               |                     |               |                    |                  |                |           |
|       |                   |           |          |         |      | <b>∅ F4</b>   |                     | <b>∅ S4</b>   |                    | <b>M S4 → F4</b> |                | <b>Nm</b> |
| F4-S4 | Full migration    | -1276.58  | -297.26  | 297.26  | 0    |               |                     |               |                    |                  |                |           |
|       | F4 → S4           | -1020.07  | -40.75   | 40.75   | 0    |               |                     |               |                    |                  |                |           |
|       | S4 → F4           | -979.32   | 0        | 0       | 1    | 4.45,<br>4.53 | (0.45) 4.49 (9.5)   | 1.82,<br>1.58 | (1.35) 1.73 (2.22) | 57, 99.7         | (57) 65 (184)  | 73        |
|       | Panmictic         | -1073.67  | -94.35   | 94.35   | 0    |               |                     |               |                    |                  |                |           |
|       | Without migration | -7146.99  | -6167.67 | 6167.67 | 0    |               |                     |               |                    |                  |                |           |
|       |                   |           |          |         |      | <b>∅ F3</b>   |                     | <b>∅ F4</b>   |                    | <b>M F3 → F4</b> |                | <b>Nm</b> |
| F3-F4 | Full migration    | -825.45   | -143.89  | 143.89  | 0    |               |                     |               |                    |                  |                |           |



|                                                                                    |                   |          |          |         |        |                 |                         |               |                        |                  |                |           |
|------------------------------------------------------------------------------------|-------------------|----------|----------|---------|--------|-----------------|-------------------------|---------------|------------------------|------------------|----------------|-----------|
|                                                                                    | F3 → F4           | -681.56  | 0        | 0       | 0.9998 | 1.97,<br>1.92   | (1.38) 1.97 (2.43)      | 2.45,<br>6.94 | (0.57) 7.04<br>(12.72) | 325, 323.84      | (96) 131 (568) | 551       |
|                                                                                    | F4 → F3           | -690.23  | -8.67    | 8.67    | 0.0002 |                 |                         |               |                        |                  |                |           |
|                                                                                    | Panmictic         | -723.33  | -41.77   | 41.77   | 0      |                 |                         |               |                        |                  |                |           |
|                                                                                    | Without migration | -1720.61 | -1039.05 | 1039.05 | 0      |                 |                         |               |                        |                  |                |           |
| <b>Nízke Tatry Mts</b>                                                             |                   |          |          |         |        | <b>∅ F5</b>     |                         | <b>∅ S5</b>   |                        | <b>M S5 → F5</b> |                | <b>Nm</b> |
| F5-S5                                                                              | Full migration    | -1954.06 | -376.57  | 376.57  | 0      |                 |                         |               |                        |                  |                |           |
|                                                                                    | F5 → S5           | -1639.67 | -62.18   | 62.18   | 0      |                 |                         |               |                        |                  |                |           |
|                                                                                    | S5 → F5           | -1577.49 | 0        | 0       | 1      | 10.94,<br>11.38 | (6.56) 11.22<br>(16.96) | 1.96,<br>1.76 | (1.2) 1.78 (2.24)      | 3, 3.68          | (0.7) 5 (11)   | 14        |
|                                                                                    | Panmictic         | -1764.48 | -186.99  | 186.99  | 0      |                 |                         |               |                        |                  |                |           |
|                                                                                    | Without migration | -4686.42 | -3108.93 | 3108.93 | 0      |                 |                         |               |                        |                  |                |           |
| † mean and mode values; * confidence intervals (2.5 % - 97.5 %) with median values |                   |          |          |         |        |                 |                         |               |                        |                  |                |           |

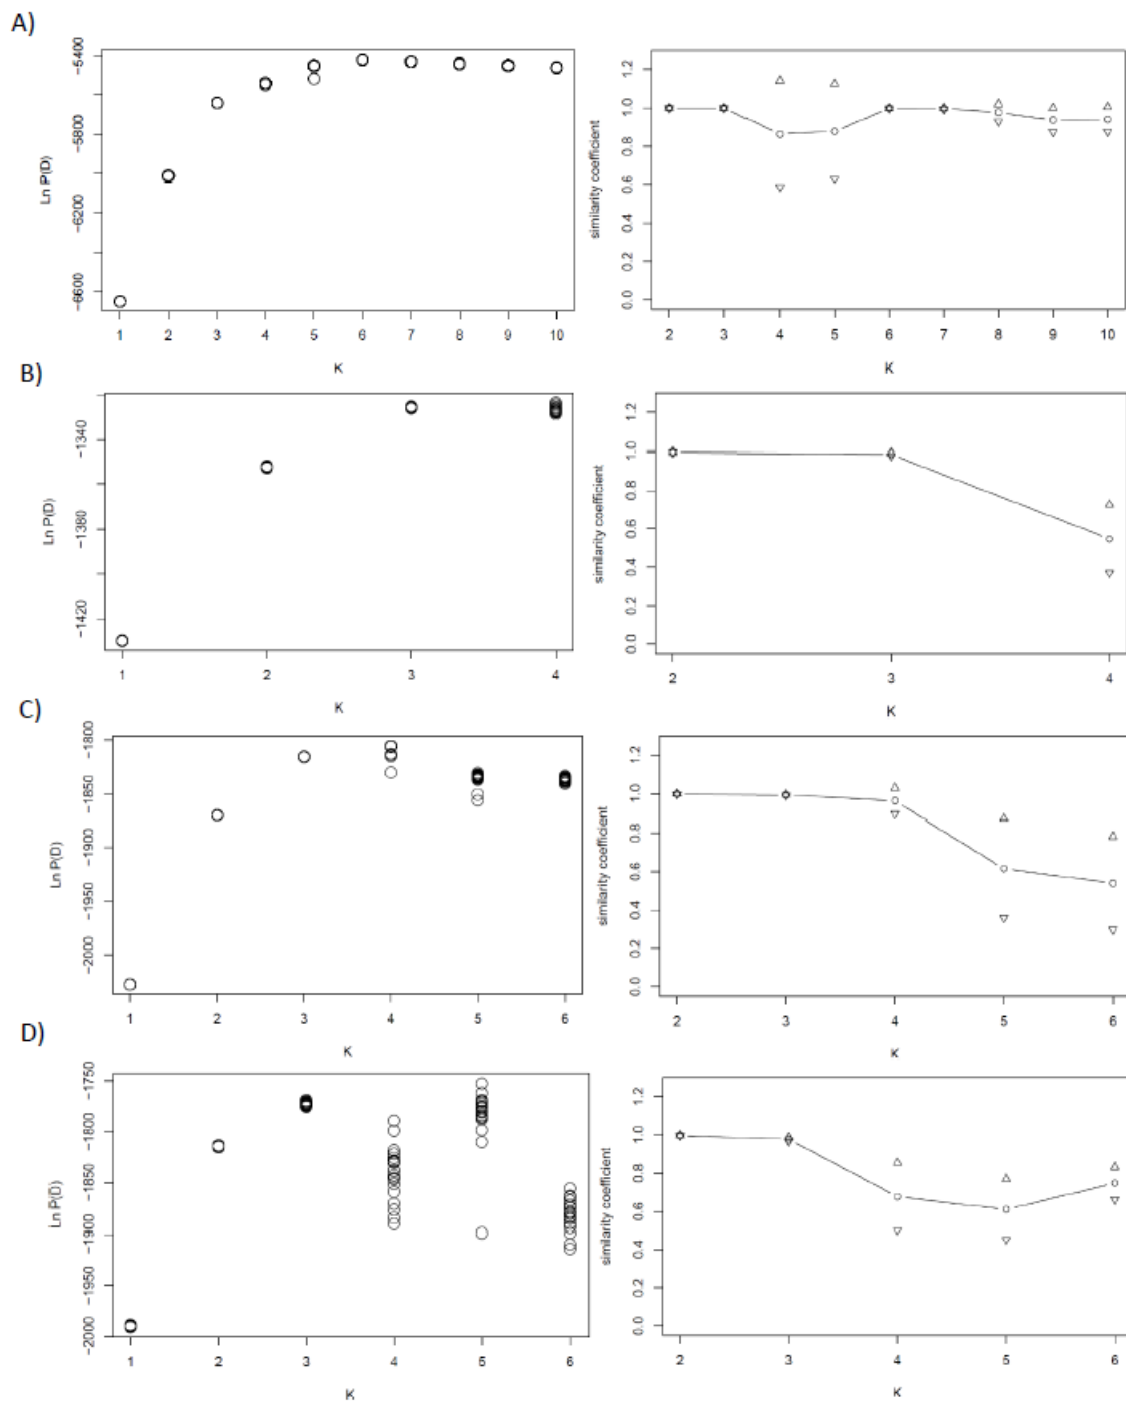

**Supplementary Figure S1.** Summary of STRUCTURE analyses runs in 20 replicates for each K, values of Ln probability are plotted against number of K (left column), coefficients of similarities among runs for particular K (right column). A) Complete dataset (all three target mountain ranges), B) the Jeseníky, C) the Krkonoše, and D) the Tatry

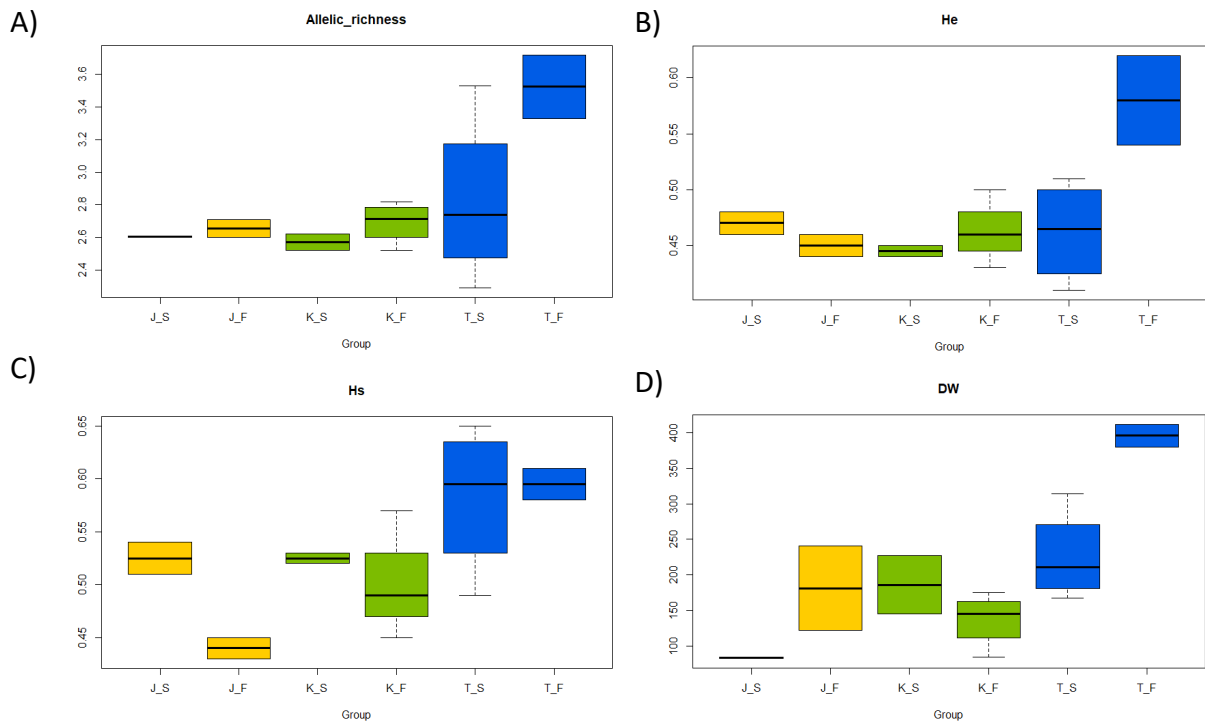

**Supplementary Figure S2.** Variation in genetic diversity of foothill and subalpine populations (J = the Jeseníky, K = the Krkonoše, T = the Tatry; F = foothill populations, S = subalpine populations), A) allelic richness, B)  $H_e$  (expected heterozygosity), C)  $H_s$  (gene diversity), and D) DW index.
